# Supplementary material for: Synergy between Allopatry and Ecology in Population Differentiation and Speciation
Source: Hindawi journal article supplement (doi:10.1155/2012/273413), 2012-01-01

Figure S1: DAPC (Discriminant Analysis of Principal Components) based on genetics and morphological data.

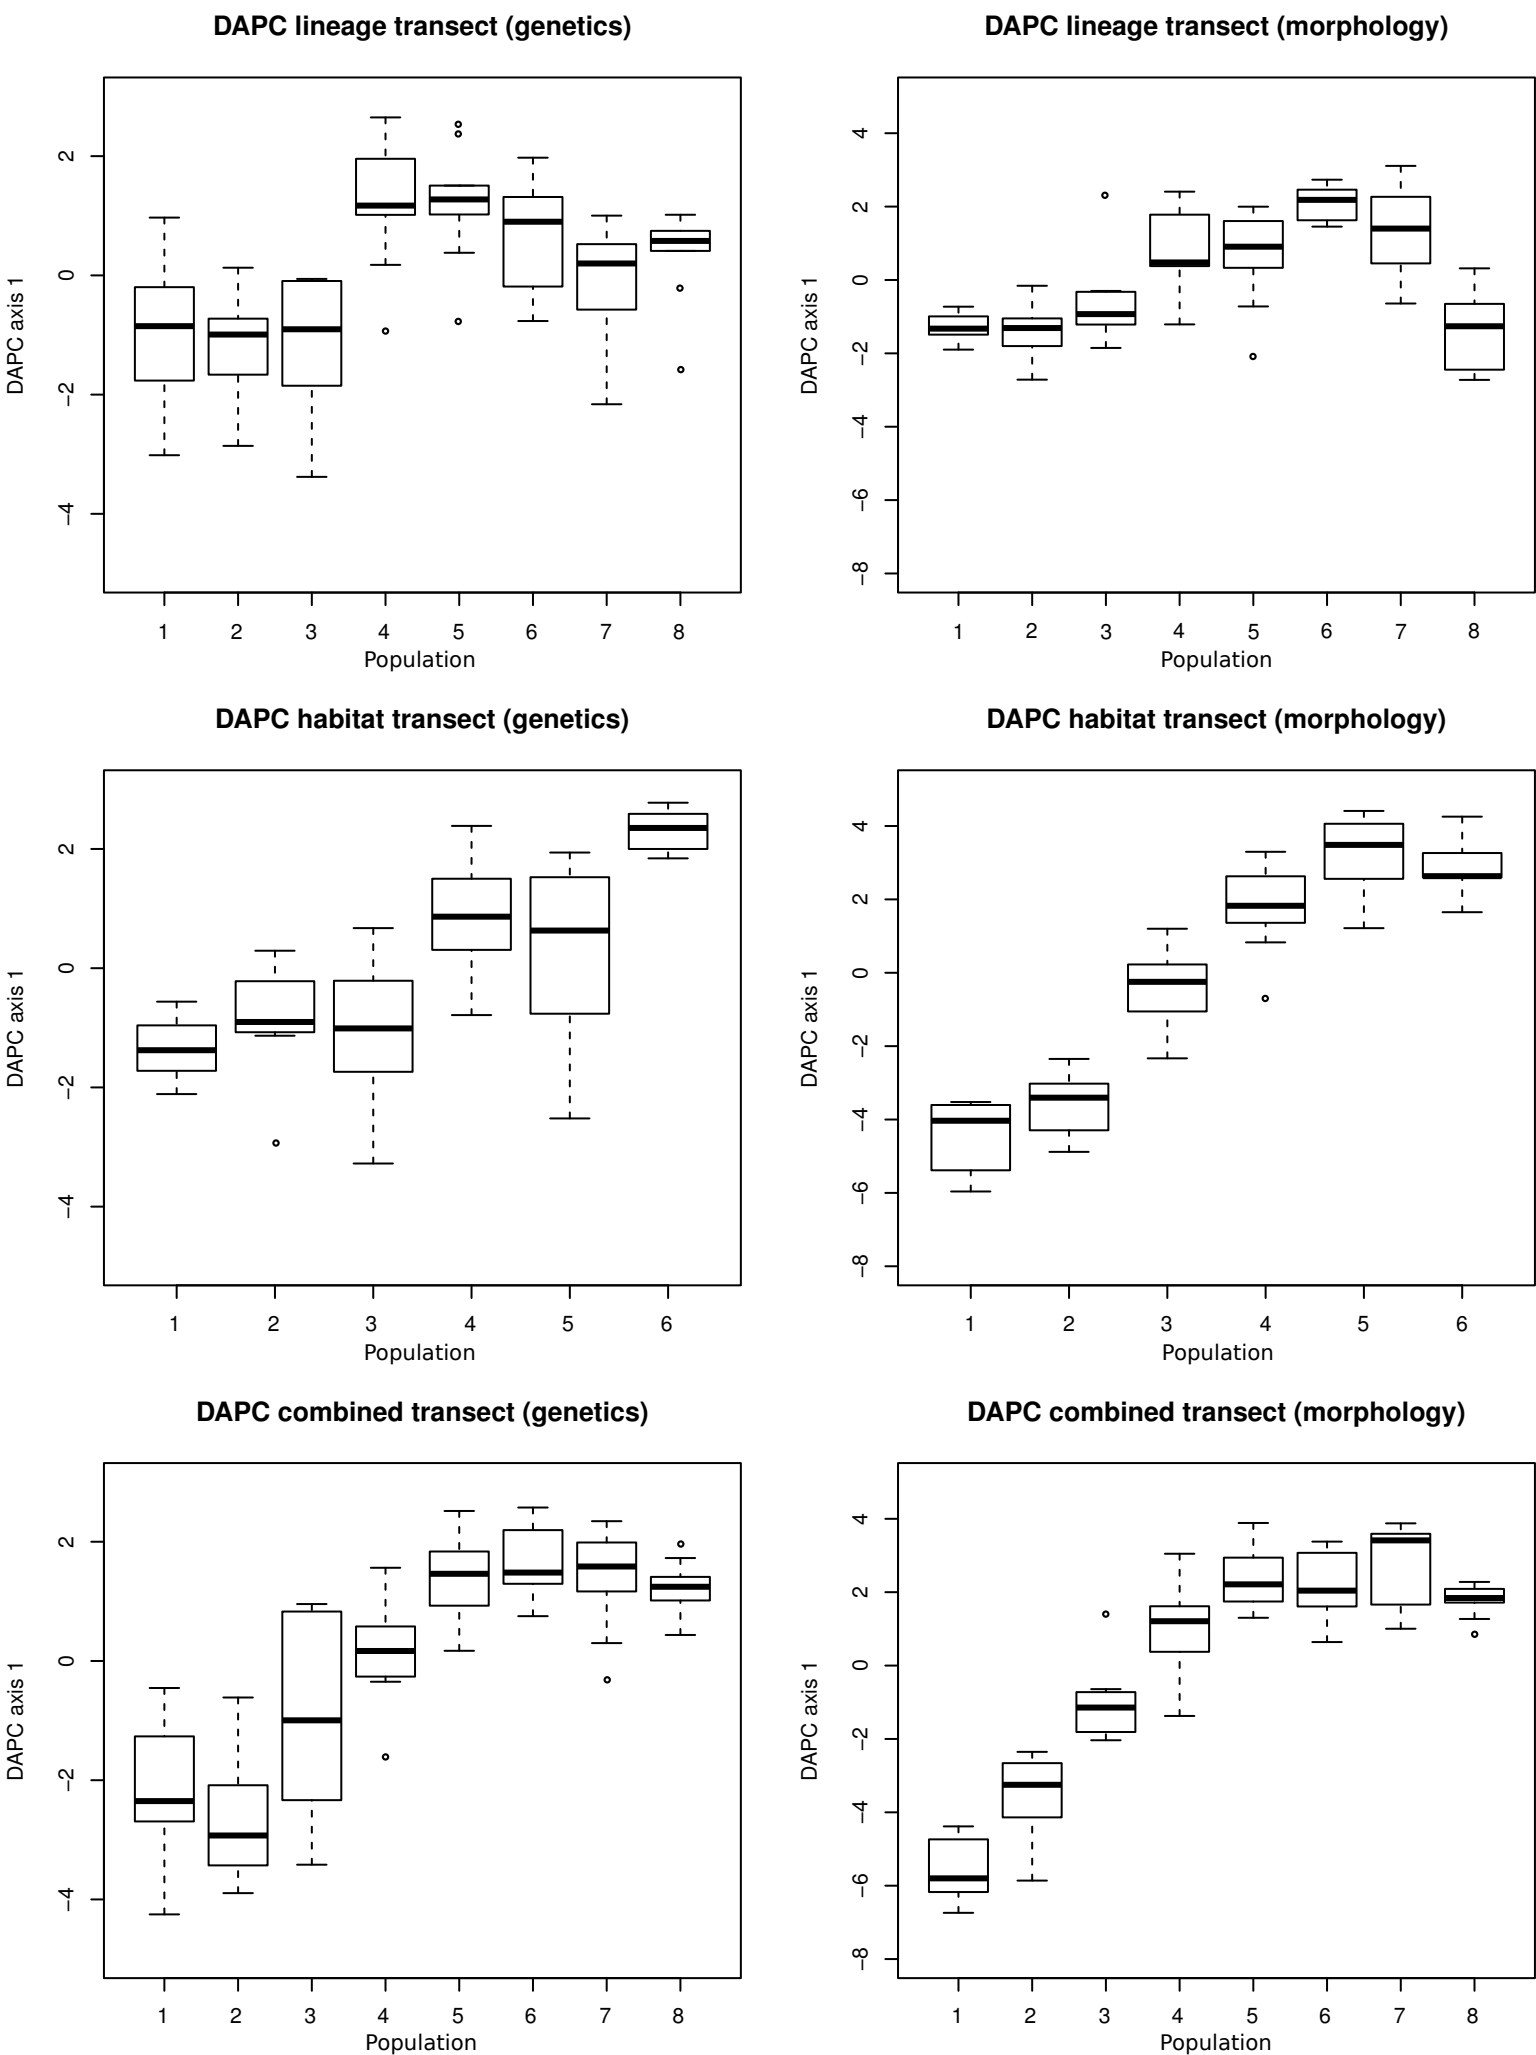

Supplement: f1 [file 273413.f1.pdf]
